# Supplementary material for: Within-species divergence in the seminal fluid proteome and its effect on male and female reproduction in a beetle
Source: PubMed Central journal article supplement (PMC4667481; doi:10.1186/s12862-015-0547-2), 2015-12-02
Supplement: 12862_2015_547_MOESM1_ESM.pdf [file 12862_2015_547_MOESM1_ESM.pdf]

Figure S1. Associations between those 56 SFPs and reproductive phenotypes that showed significant differences across populations, measured as pairwise correlations. Given are  $F^0$  (A),  $F^1$  (B),  $P_1^1$ (C),  $P_1^T$ (D),  $P_2^1$  (E) and  $P_2^T$  (F) (see main text for description of variables). Solid lines represent the critical  $r$  - value for  $P = 0.05$ . Note that SFP number is arbitrary, although consistent across plots.

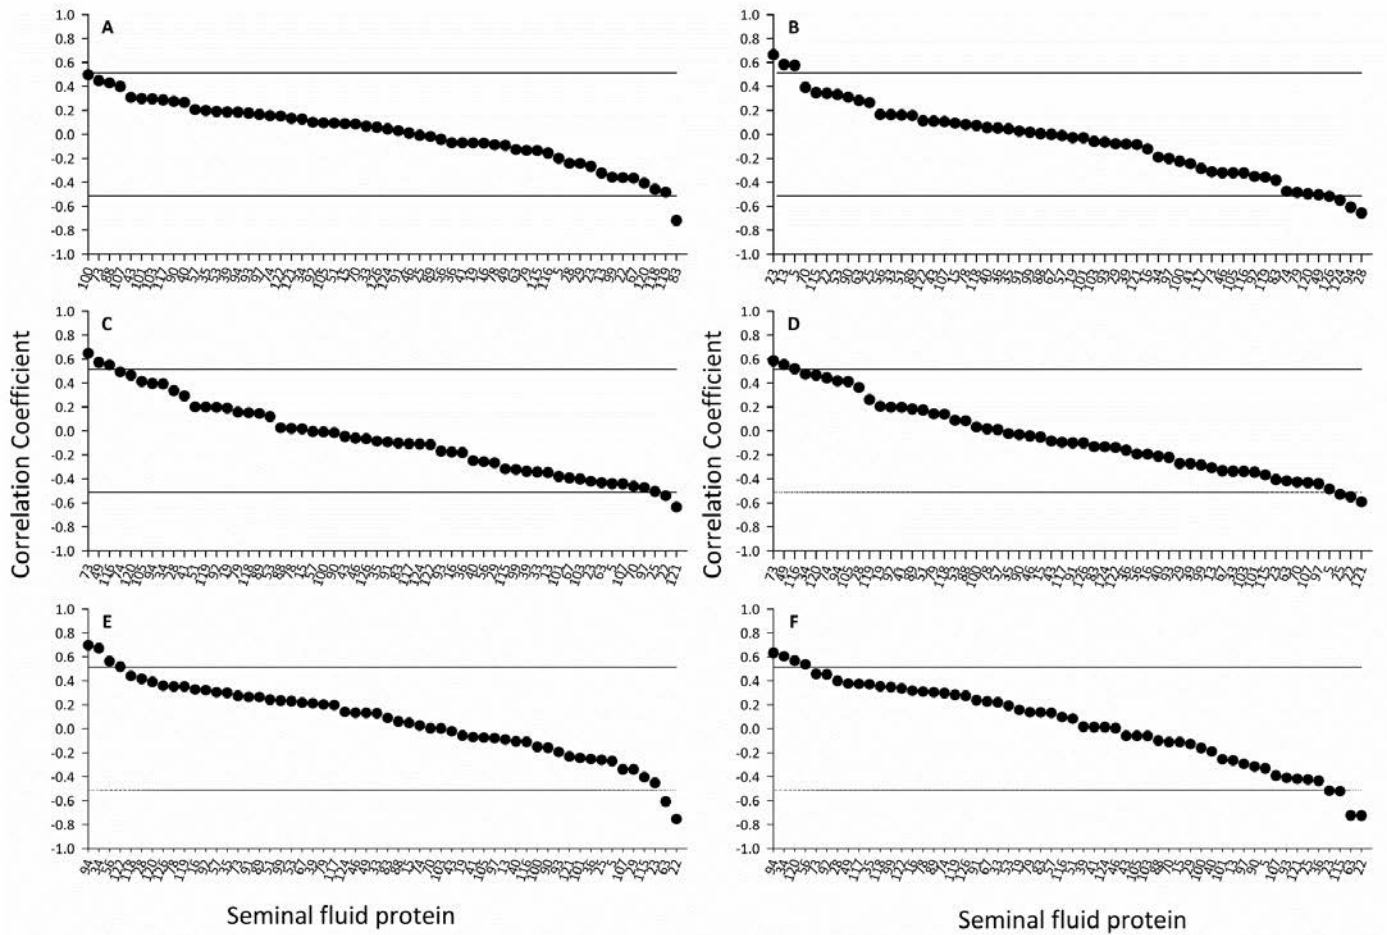

Figure S2. Hierarchical clustering of SFPs abundance across gels, based on the combined Euclidean distance and Ward's method. Colors indicate those SFPs that were significantly associated with reproductive phenotypes. Given are  $F^0$  (pink),  $F^1$  (red),  $P_1^1$  (blue),  $P_1^T$  (light blue),  $P_2^1$  (green) and  $P_2^T$  (light green) (see main text for description of variables).

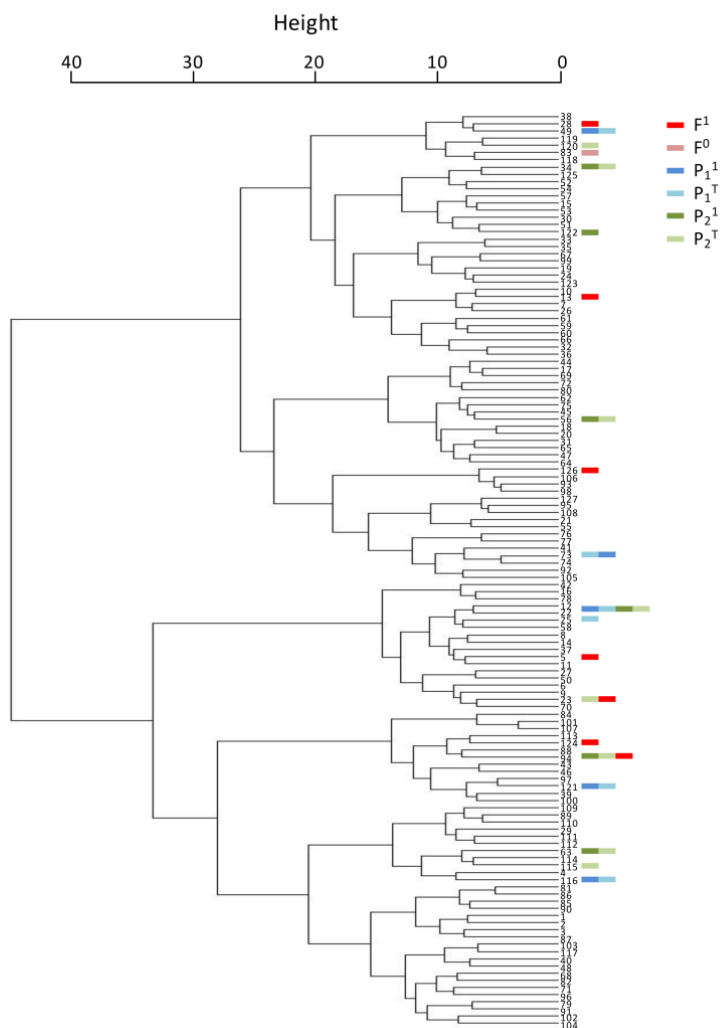

**Table S1.** Repeated measures ANOVA of female fecundity at three different time-periods. Greenhouse-Geisser adjusted *P*-values within brackets.

| Source                    | df   | <i>F</i> | <i>P</i>        |
|---------------------------|------|----------|-----------------|
| <b>Between subjects</b>   |      |          |                 |
| Population                | 14   | 0.893    | 0.5650          |
| Block                     | 1    | 58.0251  | <0.001          |
| Population × Block        | 14   | 1.311    | 0.195           |
| Lifespan                  | 1    | 45.609   | <0.001          |
| Female body weight        | 1    | 36.058   | <0.001          |
| Error                     | 521  |          |                 |
| <b>Within subjects</b>    |      |          |                 |
| Time                      | 2    | 348.005  | <0.001 (<0.001) |
| Time × Population         | 28   | 1.820    | 0.005 (0.012)   |
| Time × Block              | 2    | 16.861   | <0.001 (<0.001) |
| Time × Population × Block | 28   | 1.291    | 0.1427 (0.168)  |
| Time × Lifespan           | 2    | 17.964   | <0.001 (<0.001) |
| Time × Female body weight | 2    | 22.201   | <0.001 (<0.001) |
| Error                     | 1042 |          |                 |

**Table S2.** Two-way ANOVAs of female fecundity during each of three successive time-periods of their life.

| Sources            | F <sup>0</sup> |          |          | F <sup>1</sup> |          |          | F <sup>2</sup> |          |          |
|--------------------|----------------|----------|----------|----------------|----------|----------|----------------|----------|----------|
|                    | df             | <i>F</i> | <i>P</i> | df             | <i>F</i> | <i>P</i> | df             | <i>F</i> | <i>P</i> |
| Population         | 14             | 2.255    | 0.005    | 14             | 1.591    | 0.0773   | 14             | 1.366    | 0.164    |
| Block              | 1              | 2.476    | 0.116    | 1              | 23.176   | <0.001   | 1              | 38.927   | <0.001   |
| Population × Block | 14             | 0.854    | 0.609    | 14             | 1.514    | 0.101    | 14             | 1.252    | 0.233    |
| Lifespan           | 1              | 0.001    | 0.981    | 1              | 1.221    | 0.265    | 1              | 48.829   | <0.001   |
| Female body weight | 1              | 0.709    | 0.400    | 1              | 0.848    | 0.354    | 1              | 50.614   | <0.001   |
| Error              | 527            |          |          | 527            |          |          | 525            |          |          |

**Table S3.** Generalized linear models of the effect of population on  $P_1$  and  $P_2$ , given separately for two time-periods as well as for the total life span of females. Ejaculate weights refer to standard reference (SRS) and focal (F) males.

| Source                                                     | $P_1^0$ |                |          | $P_1^1$ |                |          | $P_1^T$ |                |          |
|------------------------------------------------------------|---------|----------------|----------|---------|----------------|----------|---------|----------------|----------|
|                                                            | df      | Deviance ratio | <i>P</i> | df      | Deviance ratio | <i>P</i> | df      | Deviance ratio | <i>P</i> |
| Population                                                 | 14      | 1.35           | 0.174    | 14      | 2.03           | 0.015    | 14      | 1.85           | 0.030    |
| Block                                                      | 1       | 0.08           | 0.784    | 1       | 7.94           | 0.005    | 1       | 4.19           | 0.041    |
| Block x Population                                         | 14      | 1.77           | 0.042    | 14      | 1.72           | 0.051    | 14      | 1.81           | 0.036    |
| No eggs between 1 <sup>st</sup> and 2 <sup>nd</sup> mating | 1       | 2.76           | 0.098    | 1       | 0.91           | 0.341    | 1       | 2.08           | 0.123    |
| Ejaculate weight ♂ <sup>SRS</sup>                          | 1       | 0.01           | 0.920    | 1       | 0.10           | 0.747    | 1       | 0.06           | 0.808    |
| Ejaculate weight ♂ <sup>F</sup>                            | 1       | 0.99           | 0.321    | 1       | 3.40           | 0.066    | 1       | 2.24           | 0.135    |
| Female body weight                                         | 1       | 2.20           | 0.139    | 1       | 2.35           | 0.126    | 1       | 2.40           | 0.122    |
| Residual                                                   | 369     |                |          | 366     |                |          | 369     |                |          |

  

| Source                                                     | $P_2^0$ |                |          | $P_2^1$ |                |          | $P_2^T$ |                |          |
|------------------------------------------------------------|---------|----------------|----------|---------|----------------|----------|---------|----------------|----------|
|                                                            | df      | Deviance ratio | <i>P</i> | df      | Deviance ratio | <i>P</i> | df      | Deviance ratio | <i>P</i> |
| Population                                                 | 14      | 1.36           | 0.191    | 14      | 6.86           | <0.001   | 14      | 2.97           | <0.001   |
| Ejaculate weight ♂ <sup>F</sup>                            | 1       | 6.31           | 0.014    | 1       | 17.5           | <0.001   | 1       | 10.70          | 0.002    |
| Ejaculate weight ♂ <sup>SRS</sup>                          | 1       | 1.03           | 0.314    | 1       | 3.9            | 0.050    |         |                |          |
| No eggs between 1 <sup>st</sup> and 2 <sup>nd</sup> mating | 1       | 4.82           | 0.031    | 1       | 3.76           | 0.056    | 1       | 4.86           | 0.030    |
| Residual                                                   | 82      |                |          | 84      |                |          | 88      |                |          |
